# Supplementary material for: The oxytocin receptor gene predicts brain activity during an emotion recognition task in autism
Source: Springer Nature journal article supplement (doi:10.1186/s13229-019-0258-4), 2019-03-12
Supplement: MOESM1 [file 16549248]

**Supplemental material**

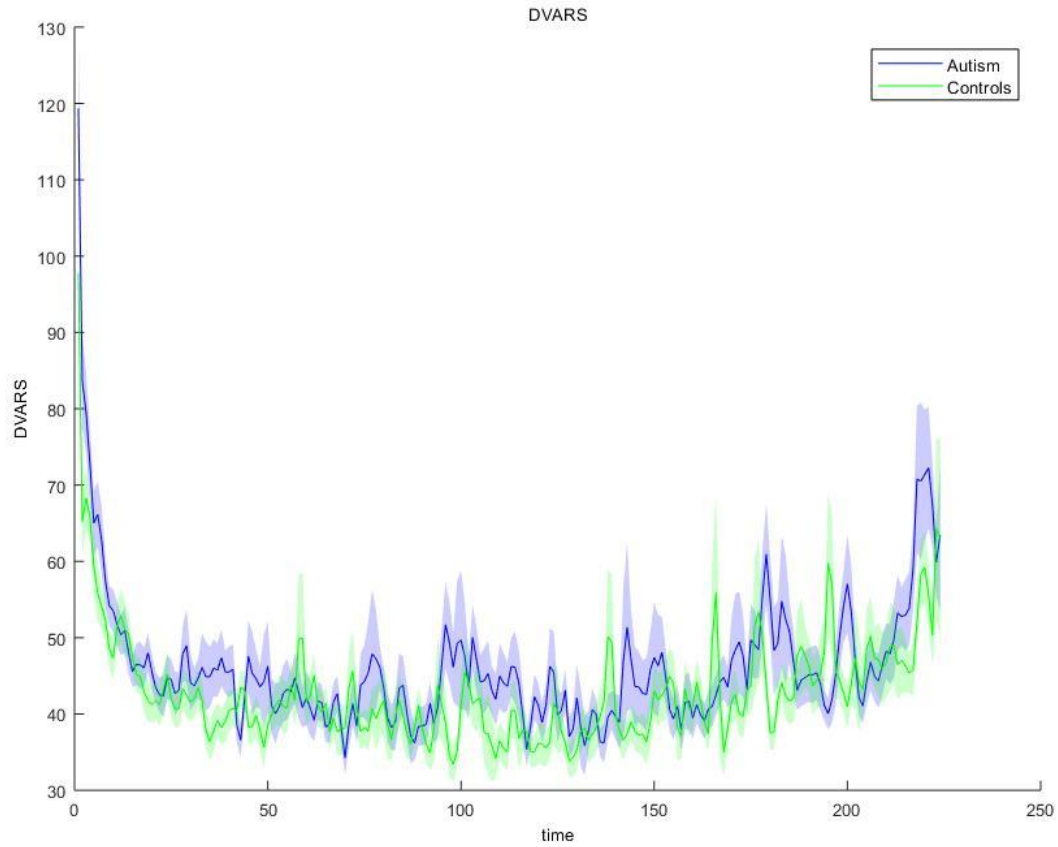

SI Figure 1. Analysis of residual head movement based on DVARS, which is a time series of the root mean squares (RMS) of the derivatives of the timecourses of all within-brain voxels for each volume. The analysis was conducted using code publishes by the Brain and Mind Lab at Aalto University, Finland.
